# Supplementary material for: GM-CSF Grown Bone Marrow Derived Cells Are Composed of Phenotypically Different Dendritic Cells and Macrophages
Source: PubMed Central journal article supplement — Mol Cells. 2016 Oct 28;39(10):734–41. doi: 10.14348/molcells.2016.0160 (PMC5104881; doi:10.14348/molcells.2016.0160), 2016-10-28
Supplement: molce-39-10-734-supple.pdf [file molce-39-10-734-supple.pdf]

1 **Supplementary Figure and Figure legend**

Figure S1.

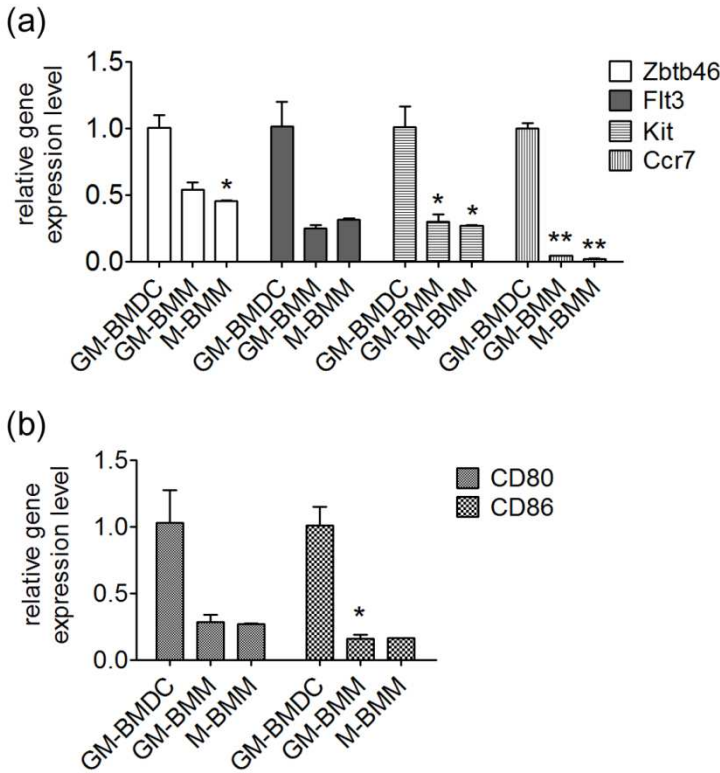

2

3 **Supplementary Figure S1. Relative gene expression intensities between GM-BMDCs, GM-**

4 **BMMs and M-BMMs (a) Classical DC-specific gene expression levels of Zbtb46, Flt3, Kit and**

5 **Ccr7 microarray results were compared. Error bars, SEM, \*, p<0.05, \*\*, p<0.005 analyzed by**

6 **student t-test, n=2. (b) Gene expression levels of CD80 and CD86 microarray results were compared.**

7 **Error bars, SEM, \*, p<0.05 analyzed by student t-test, n=2.**

8
